# Supplementary material for: IL-4 together with IL-1β induces antitumor Th9 cell differentiation in the absence of TGF-β signaling
Source: PubMed Central journal article supplement (PMC6435687; doi:10.1038/s41467-019-09401-9), 2019-03-26
Supplement: 41467_2019_9401_MOESM1_ESM.pdf [file 41467_2019_9401_MOESM1_ESM.pdf]

## **SUPPLEMENTARY INFORMATION**

**Title: IL-4 together with IL-1 $\beta$  induces antitumor Th9 cell differentiation in the absence of TGF- $\beta$  signaling**

**Authors: Gang Xue et al**

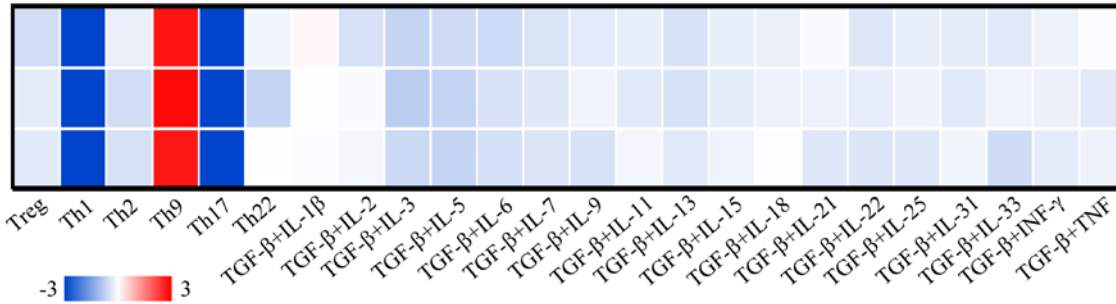

**Supplementary Figure 1. Heatmap illustrating the relative expression of *IL9* under conditions as indicated at day 3 after *in vivo* differentiation (data are log scaled).** Naïve CD4<sup>+</sup> CD62L<sup>+</sup> T cells were purified from the spleens of TRP-1 mice and cocultured with irradiated antigen-presenting cells under polarized conditions as detailed in the Methods (polarized *in vitro* for 3 days, n = 3). RT-PCR was used to determine relative *IL9* gene expression. Representative results from one of two repeated experiments are shown.

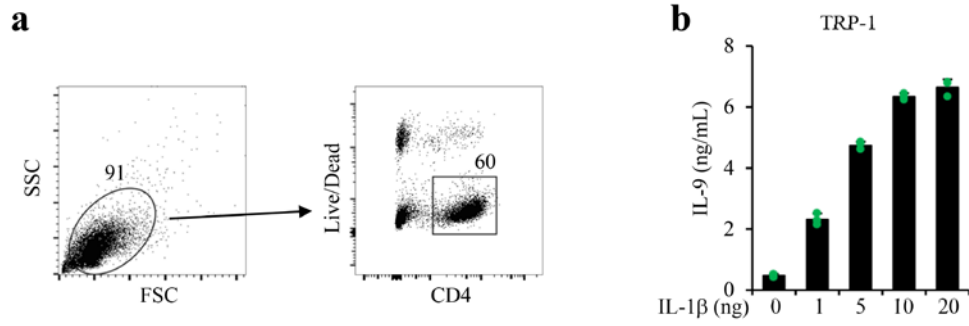

**Supplementary Figure 2. ELISA of IL-9 production in the supernatants of Th9<sup>IL-4+IL-1 $\beta$</sup>  cells at indicated IL-1 $\beta$  concentrations.** (a) Gating strategy to determine CD4<sup>+</sup> T cells. (b) Naïve CD4<sup>+</sup> CD62L<sup>+</sup> T cells were purified from the spleens of TRP-1 mice and cocultured with irradiated antigen-presenting cells under polarized conditions as detailed in the Methods. Data are mean  $\pm$  SD (polarized *in vitro* for 3 days, n = 3). Representative results from one of two repeated experiments are shown.

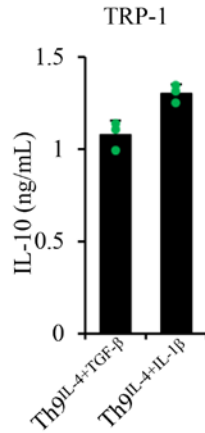

**Supplementary Figure 3. ELISA of IL-10 production in the supernatants of Th9<sup>IL-4+TGF-β</sup> cells and Th9<sup>IL-4+IL-1β</sup> cells.** Naïve CD4<sup>+</sup> CD62L<sup>+</sup> T cells were purified from the spleens of TRP-1 mice and cocultured with irradiated antigen-presenting cells under polarized conditions as detailed in the Methods. Data are mean ± SD (polarized *in vitro* for 3 days, n = 3). Representative results from one of two repeated experiments are shown.

**a**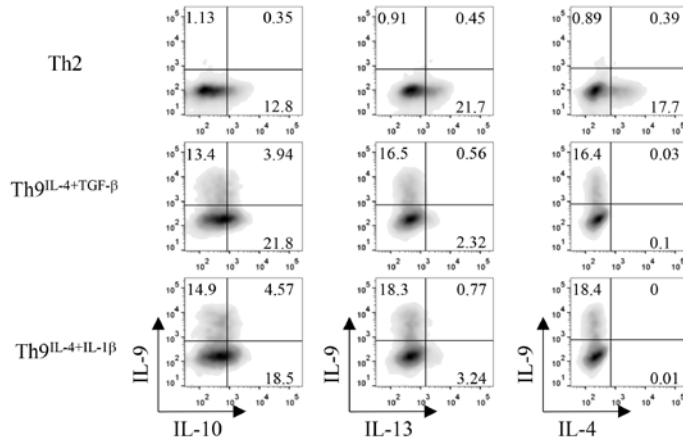**b**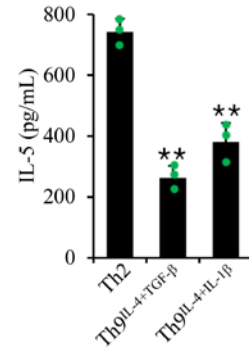

**Supplementary Figure 4. The expression of IL-4, IL-5 or IL-13 in Th2, Th9<sup>IL-4+TGF-β</sup>, and Th9<sup>IL-4+IL-1β</sup> cells.** Naïve CD4<sup>+</sup> CD62L<sup>+</sup> T cells were purified from the spleens of TRP-1 mice and stimulated with αCD3/αCD28 as detailed in the Methods. (a) Intracellular staining showing the percentages of IL-4, IL-9, IL-10, IL-13 producing cells in polarized Th2, classic Th9<sup>IL-4+TGF-β</sup> and Th9<sup>IL-4+IL-1β</sup> cells. (b) ELISA of IL-5 production in the supernatants of Th2, Th9<sup>IL-4+TGF-β</sup> cells, and Th9<sup>IL-4+IL-1β</sup> cells. Data are mean ± SD (polarized *in vitro* for 3 days, n = 3). \*\**P* < 0.01, compared with Th2 cells, Student's *t*-test. Representative results from one of two repeated experiments are shown.

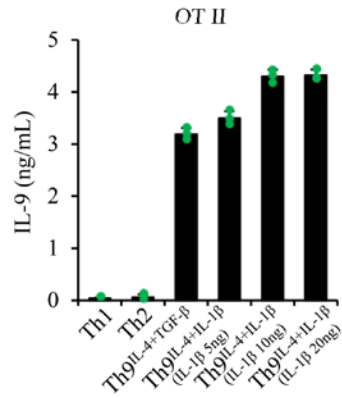

**Supplementary Figure 5. ELISA of IL-9 production in the supernatants of OVA-specific Th1, Th2, classic Th9<sup>IL-4+TGF-β</sup> and Th9<sup>IL-4+IL-1β</sup> cells.** Naïve CD4<sup>+</sup> CD62L<sup>+</sup> T cells were purified from the spleens of OT II mice and cocultured with irradiated antigen-presenting cells under polarized conditions as detailed in the Methods. Data are mean ± SD (polarized *in vitro* for 3 days, n = 3). Representative results from one of two repeated experiments are shown.

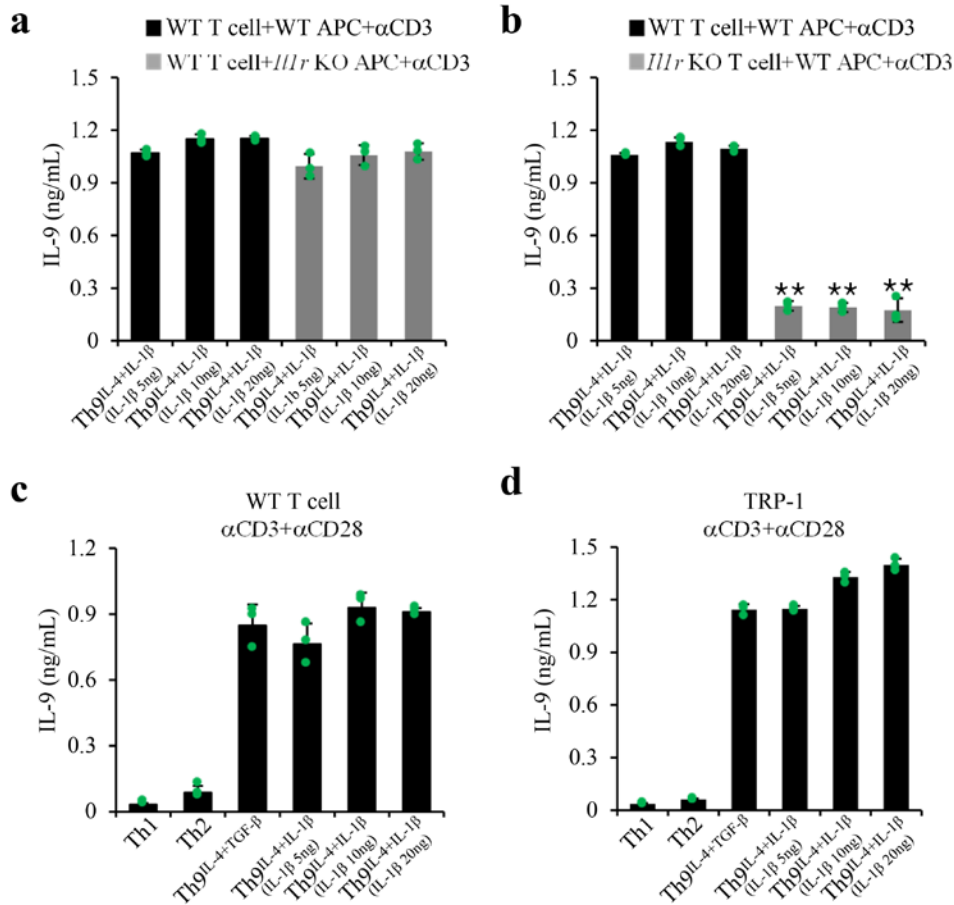

**Supplementary Figure 6. ELISA for IL-9 production in the supernatants of Th1, Th2, classic Th9<sup>IL-4+TGF- $\beta$</sup>  and Th9<sup>IL-4+IL-1 $\beta$</sup>  cells.** (a) Naïve CD4<sup>+</sup> CD62L<sup>+</sup> T cells were purified from the spleens of WT mice and cocultured with irradiated antigen-presenting cells from WT mice or *Illr* KO mice under polarized conditions as detailed in the Methods for 3 days. (b) Naïve CD4<sup>+</sup> CD62L<sup>+</sup> T cells were purified from the spleens of WT mice or *Illr* KO mice and cocultured with irradiated antigen-presenting cells from WT mice under polarized conditions as detailed in the Methods for 3 days. (c) Naïve CD4<sup>+</sup> CD62L<sup>+</sup> T cells were purified from the spleens of WT mice and stimulated by plate-bound  $\alpha$ CD3/ $\alpha$ CD28 under polarized conditions as detailed in the Methods for 3 days. (d) Naïve CD4<sup>+</sup> CD62L<sup>+</sup> T cells were purified from the spleens of TRP-1 mice and stimulated by plate-bound  $\alpha$ CD3/ $\alpha$ CD28 under polarized conditions as detailed in the Methods for 3 days. Data are mean  $\pm$  SD (polarized *in vitro* for 3 days, n = 3). \*\**P* < 0.01, compared to the cultures with WT T cells, Student's *t*-test. Representative results from one of two repeated experiments are shown.

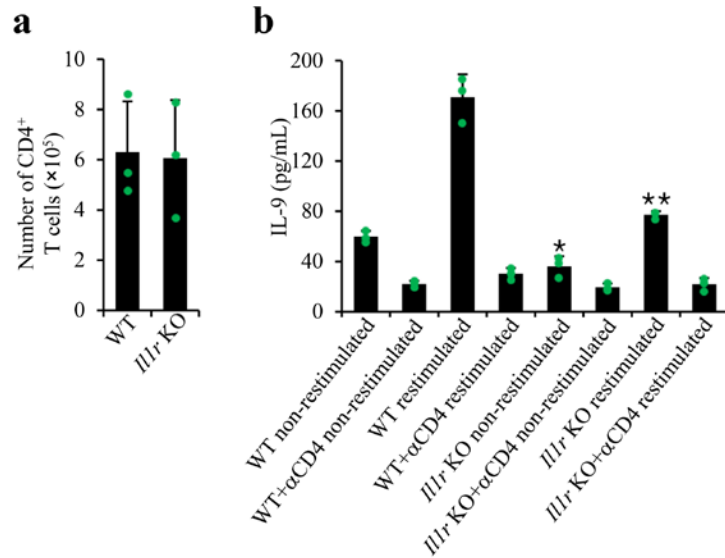

**Supplementary Figure 7. IL-9 production was measured by ELISA in the supernatants of restimulated or non-restimulated of mice lung leukocytes.** (a) The calculated number of CD4<sup>+</sup> T cells in the WT mice and *Illr* KO mice from lung tumor leukocyte fraction. (b) C57BL/6 mice WT mice or *Illr* KO mice were challenged with  $1 \times 10^5$  B16-OVA melanoma cells. Mice were given control IgG or  $\alpha$ CD4 mAbs (clone GK1.5, 200  $\mu$ g/mice) on day 8 and day 11, and then sacrificed on day 14. The lung tumor tissue leukocytes were restimulated or non-restimulated with OT II peptides for 36 hours, and then IL-9 production was measured by ELISA. Data are mean  $\pm$  SD (n = 3 mice). \* $P < 0.05$ , compared with WT non-restimulated, \*\* $P < 0.01$ , compared with WT restimulated, Student's *t*-test. Representative results from one of two repeated experiments are shown.



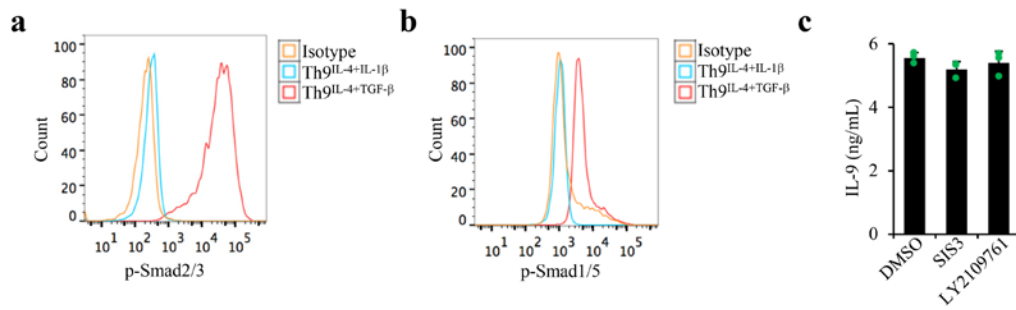

**Supplementary Figure 8. Smads activation is not required for IL-9 production in Th9<sup>IL-4+IL-1β</sup> cells.**

Naïve CD4<sup>+</sup> CD62L<sup>+</sup> T cells were purified from the spleens of TRP-1 mice and cocultured with irradiated antigen-presenting cells under polarized conditions as detailed in the Methods. (a) Flow analysis of activation status of p-Smad2/3 in Th9<sup>IL-4+IL-1β</sup> cells and Th9<sup>IL-4+TGF-β</sup> cells. (b) Flow analysis of activation status of p-Smad1/5 in Th9<sup>IL-4+IL-1β</sup> cells and Th9<sup>IL-4+TGF-β</sup> cells. (c) ELISA of IL-9 production in the supernatants of Th9<sup>IL-4+IL-1β</sup> cells in the presence of Smads inhibitors or DMSO. Data are mean ± SD (polarized *in vitro* for 3 days, n = 3). Representative results from one of two repeated experiments are shown.

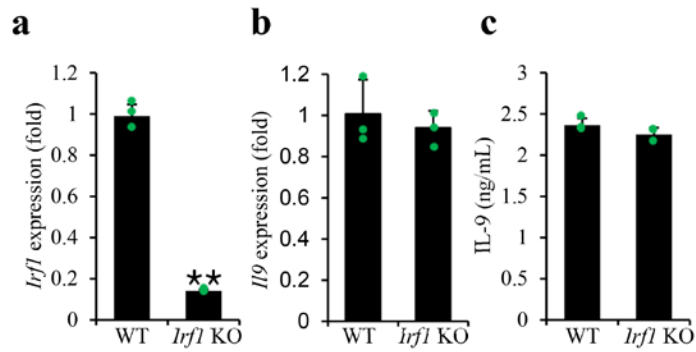

**Supplementary Figure 9. IRF-1 is not required for IL-9 production from Th9<sup>IL-4+IL-1 $\beta$</sup>  cells.** Naïve CD4<sup>+</sup> CD62L<sup>+</sup> T cells were purified from the spleens of wild-type (WT) mice or *Irfl* knockout (KO) mice and cultured with plate-bound anti-CD3 mAbs and soluble anti-CD28 mAbs under polarized conditions as detailed in the Methods. (a) RT-PCR analysis of the *Irfl* transcriptional level of Th9<sup>IL-4+IL-1 $\beta$</sup>  cells from WT mice or *Irfl* KO mice. (b and c) RT-PCR analysis of *Il9* transcriptional level (b) and ELISA of IL-9 production in the supernatants (c) of Th9<sup>IL-4+IL-1 $\beta$</sup>  cells from WT mice or *Irfl* KO mice. Data are mean  $\pm$  SD (polarized *in vitro* for 3 days, n = 3). \*\* $P < 0.01$ , Student's *t*-test. Representative results from one of two repeated experiments are shown.

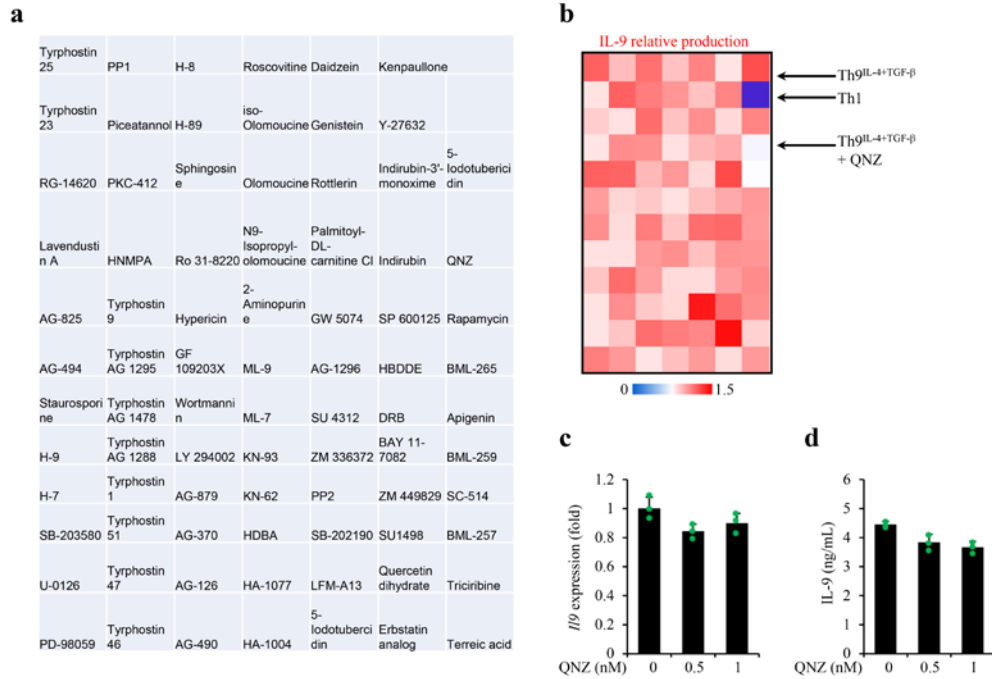

**Supplementary Figure 10. The function of NF- $\kappa$ B pathway on Th9<sup>IL-4+TGF- $\beta$</sup>  cell differentiation. (a)**

The inhibitor labels of Kinase Inhibitor library. (b) IL-9 production was measured by ELISA in the supernatants of *in vitro* differentiated T cells. Shown is the heatmap of IL-9 relative production in the supernatants of Th1, Th9<sup>IL-4+TGF- $\beta$</sup>  cells and inhibitor-treated Th9<sup>IL-4+TGF- $\beta$</sup>  cells. (c and d) RT-PCR analysis of *Il9* transcriptional level (c) and ELISA of IL-9 production in the supernatants (d) of QNZ-treated Th9<sup>IL-4+TGF- $\beta$</sup>  cells at indicated concentrations. QNZ, NF- $\kappa$ B pathway inhibitor. Data are mean  $\pm$  SD (polarized *in vitro* for 3 days, n = 3). Representative results from one of two repeated experiments are shown.

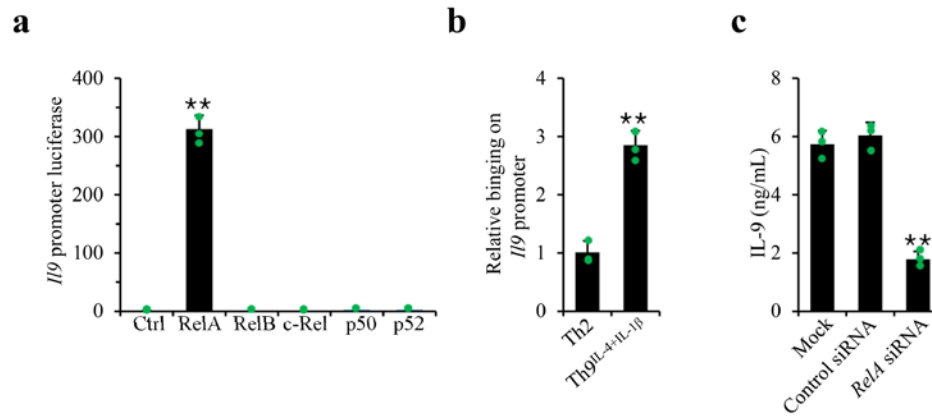

**Supplementary Figure 11. The function of NF- $\kappa$ B family member RelA on IL-9 production in Th9<sup>IL-4+IL-1 $\beta$</sup>  cells.** (a) Luciferase reporter assay for the activation of *Il9* promoter in 293T cells. (b) ChIP analysis of the binding of RelA at the *Il9* promoter in Th2 cells and Th9<sup>IL-4+IL-1 $\beta$</sup>  cells. (c) ELISA of IL-9 production in the supernatants of Th9<sup>IL-4+IL-1 $\beta$</sup>  cells treated by Mock or Control siRNA or RelA siRNA. Data are mean  $\pm$  SD (polarized in vitro for 3 days, n = 3). \*\*P < 0.01, compared with others, Student's *t*-test. Representative results from one of two repeated experiments are shown.

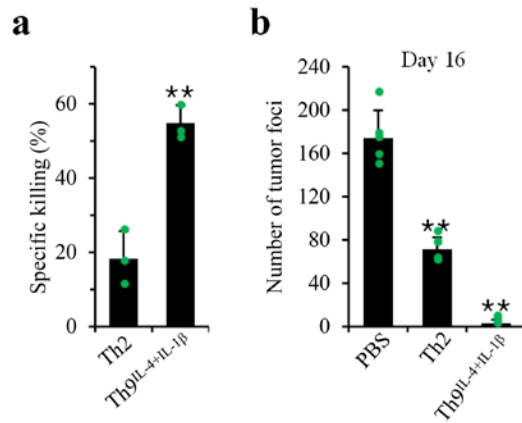

**Supplementary Figure 12. Th9<sup>IL-4+IL-1β</sup> cells exhibited a greater anti-tumor capacity than Th2 cells.**

(a) Specific killing capacity of TRP-1 Th2 cells or Th9<sup>IL-4+IL-1β</sup> cells were performed against CFSE<sup>high</sup>-B16 tumor cells as target cells (CFSE<sup>low</sup>-MC38 tumor cells were used as a non-target control). An E:T ratio of 10:1 was used, and specific killing was determined after 48h of coculture (n = 3). (b) C57BL/6 mice were challenged with  $1 \times 10^5$  B16 cells delivered intravenously.  $1 \times 10^6$  TRP-1-specific Th2 cells or Th9<sup>IL-4+IL-1β</sup> cells were transferred on day 6 after tumor challenge, tumor foci in the lung were counted on day 16 after tumor inoculation (n = 5 mice/group). Data are mean  $\pm$  SD; \*\* $P < 0.01$ , compared with other groups, Student's *t*-test. Representative results from one of two repeated experiments are shown.
