# Supplementary material for: IL-4 together with IL-1β induces antitumor Th9 cell differentiation in the absence of TGF-β signaling
Source: PubMed Central journal article supplement (PMC6435687; doi:10.1038/s41467-019-09401-9), 2019-03-26
Supplement: 41467_2019_9401_MOESM2_ESM.pdf [file 41467_2019_9401_MOESM2_ESM.pdf]

## Reporting Summary

Nature Research wishes to improve the reproducibility of the work that we publish. This form provides structure for consistency and transparency in reporting. For further information on Nature Research policies, see [Authors & Referees](#) and the [Editorial Policy Checklist](#).

### Statistics

For all statistical analyses, confirm that the following items are present in the figure legend, table legend, main text, or Methods section.

n/a Confirmed

- The exact sample size ( $n$ ) for each experimental group/condition, given as a discrete number and unit of measurement
- A statement on whether measurements were taken from distinct samples or whether the same sample was measured repeatedly
- The statistical test(s) used AND whether they are one- or two-sided  
*Only common tests should be described solely by name; describe more complex techniques in the Methods section.*
- A description of all covariates tested
- A description of any assumptions or corrections, such as tests of normality and adjustment for multiple comparisons
- A full description of the statistical parameters including central tendency (e.g. means) or other basic estimates (e.g. regression coefficient) AND variation (e.g. standard deviation) or associated estimates of uncertainty (e.g. confidence intervals)
- For null hypothesis testing, the test statistic (e.g.  $F$ ,  $t$ ,  $r$ ) with confidence intervals, effect sizes, degrees of freedom and  $P$  value noted  
*Give  $P$  values as exact values whenever suitable.*
- For Bayesian analysis, information on the choice of priors and Markov chain Monte Carlo settings
- For hierarchical and complex designs, identification of the appropriate level for tests and full reporting of outcomes
- Estimates of effect sizes (e.g. Cohen's  $d$ , Pearson's  $r$ ), indicating how they were calculated

*Our web collection on [statistics for biologists](#) contains articles on many of the points above.*

### Software and code

Policy information about [availability of computer code](#)

Data collection

BD FACSDiva software

Data analysis

Flowjo 10

For manuscripts utilizing custom algorithms or software that are central to the research but not yet described in published literature, software must be made available to editors/reviewers. We strongly encourage code deposition in a community repository (e.g. GitHub). See the Nature Research [guidelines for submitting code & software](#) for further information.

### Data

Policy information about [availability of data](#)

All manuscripts must include a [data availability statement](#). This statement should provide the following information, where applicable:

- Accession codes, unique identifiers, or web links for publicly available datasets
- A list of figures that have associated raw data
- A description of any restrictions on data availability

The microarray data reported in this paper is deposited in the Gene Expression Omnibus (GEO) database under accession number GSE123624. The data that support the findings of this study are available from the corresponding author upon reasonable request.

### Field-specific reporting

Please select the one below that is the best fit for your research. If you are not sure, read the appropriate sections before making your selection.

- Life sciences       Behavioural & social sciences       Ecological, evolutionary & environmental sciences

## Life sciences study design

All studies must disclose on these points even when the disclosure is negative.

|                 |                                                                                                                                                                        |
|-----------------|------------------------------------------------------------------------------------------------------------------------------------------------------------------------|
| Sample size     | No sample-size calculations were performed. Sample size was determined to be adequate based on the magnitude and consistency of measurable differences between groups. |
| Data exclusions | No data were excluded.                                                                                                                                                 |
| Replication     | Experimental findings were highly reproducible each time                                                                                                               |
| Randomization   | No randomization of mice. Mice analyzed were litter mates and sex-matched whenever possible.                                                                           |
| Blinding        | The investigators were blinded to allocation during experiments and outcome assessment.                                                                                |

## Reporting for specific materials, systems and methods

We require information from authors about some types of materials, experimental systems and methods used in many studies. Here, indicate whether each material, system or method listed is relevant to your study. If you are not sure if a list item applies to your research, read the appropriate section before selecting a response.

### Materials & experimental systems

### Methods

| n/a                                 | Involved in the study                                           | n/a                                 | Involved in the study                              |
|-------------------------------------|-----------------------------------------------------------------|-------------------------------------|----------------------------------------------------|
| <input type="checkbox"/>            | <input checked="" type="checkbox"/> Antibodies                  | <input checked="" type="checkbox"/> | <input type="checkbox"/> ChIP-seq                  |
| <input type="checkbox"/>            | <input checked="" type="checkbox"/> Eukaryotic cell lines       | <input type="checkbox"/>            | <input checked="" type="checkbox"/> Flow cytometry |
| <input checked="" type="checkbox"/> | <input type="checkbox"/> Palaeontology                          | <input checked="" type="checkbox"/> | <input type="checkbox"/> MRI-based neuroimaging    |
| <input type="checkbox"/>            | <input checked="" type="checkbox"/> Animals and other organisms |                                     |                                                    |
| <input checked="" type="checkbox"/> | <input type="checkbox"/> Human research participants            |                                     |                                                    |
| <input checked="" type="checkbox"/> | <input type="checkbox"/> Clinical data                          |                                     |                                                    |

## Antibodies

|                 |                                                                                                                                                                                                                                                                                                                                                                                                                                                                                                                                                                                                                                                                                                                                                                         |
|-----------------|-------------------------------------------------------------------------------------------------------------------------------------------------------------------------------------------------------------------------------------------------------------------------------------------------------------------------------------------------------------------------------------------------------------------------------------------------------------------------------------------------------------------------------------------------------------------------------------------------------------------------------------------------------------------------------------------------------------------------------------------------------------------------|
| Antibodies used | IL-4-neutralizing antibody (clone 11B11) from BioXcell<br>IFN- $\gamma$ -neutralizing antibody (clone XMG1.2) from BioXcell<br>IL-9-neutralizing antibody (clone 9C1) from BioXcell<br>CD4 depletion antibody (clone GK1.5) from BioXcell<br>TGF- $\beta$ neutralizing antibody (clone 1D.11.16.8) from BioXcell<br>$\alpha$ p-Smad-3 flow antibody (clone O72-670) from BD<br>$\alpha$ p-Smad-5 flow antibody (clone 41D10) from CST<br>$\alpha$ CD4 flow antibody (clone RM4-4) from ThermoFisher<br>$\alpha$ IL-9 flow antibody (clone RM9A4) from ThermoFisher<br>$\alpha$ IL-4 flow antibody (clone 11b11) from ThermoFisher<br>$\alpha$ IL-10 flow antibody (clone JES5-16E3) from ThermoFisher<br>$\alpha$ IL-13 flow antibody (clone eBio13A) from ThermoFisher |
| Validation      | All detailed validation information of these antibody can be obtained on the website.                                                                                                                                                                                                                                                                                                                                                                                                                                                                                                                                                                                                                                                                                   |

## Eukaryotic cell lines

Policy information about [cell lines](#)

|                                                                   |                                                                                                                            |
|-------------------------------------------------------------------|----------------------------------------------------------------------------------------------------------------------------|
| Cell line source(s)                                               | B16 melanoma cell line was purchased from ATCC, MC-38 cell line was a gift from Dr.Patrick Hwu, MD Anderson Cancer Center. |
| Authentication                                                    | None of the cell lines used were authenticated.                                                                            |
| Mycoplasma contamination                                          | All cell lines were tested negative for mycoplasma contamination.                                                          |
| Commonly misidentified lines (See <a href="#">ICLAC</a> register) | No commonly misidentified cell lines were used.                                                                            |

## Animals and other organisms

Policy information about [studies involving animals](#); [ARRIVE guidelines](#) recommended for reporting animal research

|                         |                                                                                                                                                                                                                     |
|-------------------------|---------------------------------------------------------------------------------------------------------------------------------------------------------------------------------------------------------------------|
| Laboratory animals      | C57BL/6, B6.Cg-Tg(Cd4-TGFBR2)16Flv/J, B6.129S2-Irf1tm1Mak/J, B6.Cg-Tg(TcraTcrb)425Cbn/J, B6.129S7-Il1r1tm1Imx/J and B6.Cg-Rag1tm1Mom Tyrp1B-w Tg(Tcra,Tcrb)9Rest/J mice were purchased from The Jackson Laboratory. |
| Wild animals            | This study does not involve wild animals.                                                                                                                                                                           |
| Field-collected samples | This study does not involve field-collected samples.                                                                                                                                                                |
| Ethics oversight        | All experiments complied with protocols approved by the Institutional Animal Care and Use Committee at the Wake Forest School of Medicine.                                                                          |

Note that full information on the approval of the study protocol must also be provided in the manuscript.

## Flow Cytometry

### Plots

Confirm that:

- The axis labels state the marker and fluorochrome used (e.g. CD4-FITC).
- The axis scales are clearly visible. Include numbers along axes only for bottom left plot of group (a 'group' is an analysis of identical markers).
- All plots are contour plots with outliers or pseudocolor plots.
- A numerical value for number of cells or percentage (with statistics) is provided.

### Methodology

|                           |                                                                                                                                         |
|---------------------------|-----------------------------------------------------------------------------------------------------------------------------------------|
| Sample preparation        | Sample preparation listed in Methods.                                                                                                   |
| Instrument                | BD LSRFortessa X-20 Cell Analyzer.                                                                                                      |
| Software                  | Flowjo 10.                                                                                                                              |
| Cell population abundance | More than 90%.                                                                                                                          |
| Gating strategy           | Debris was first excluded by a morphology gate based on FSC-A and SSC-A. Then, we gated on LIVE/DEAD- CD4+ cells to exclude dead cells. |

- Tick this box to confirm that a figure exemplifying the gating strategy is provided in the Supplementary Information.
