# Supplementary material for: IL-4 together with IL-1β induces antitumor Th9 cell differentiation in the absence of TGF-β signaling
Source: PubMed Central journal article supplement (PMC6435687; doi:10.1038/s41467-019-09401-9), 2019-03-26
Supplement: 41467_2019_9401_MOESM3_ESM.pdf [file 41467_2019_9401_MOESM3_ESM.pdf]

### **Description of Additional Supplementary Files**

File Name: Supplementary Data 1

Description: Gene list of cluster 2 in Fig. 2

File Name: Supplementary Data 2

Description: Gene list of cluster 4 in Fig. 2

File Name: Supplementary Data 3

Description: Gene list of cluster 6 in Fig. 2
